# Supplementary material
Source: PubMed Central journal article supplement (PMC6776581)
Supplement: 13238_2019_614_MOESM1_ESM.pdf [file 13238_2019_614_MOESM1_ESM.pdf]

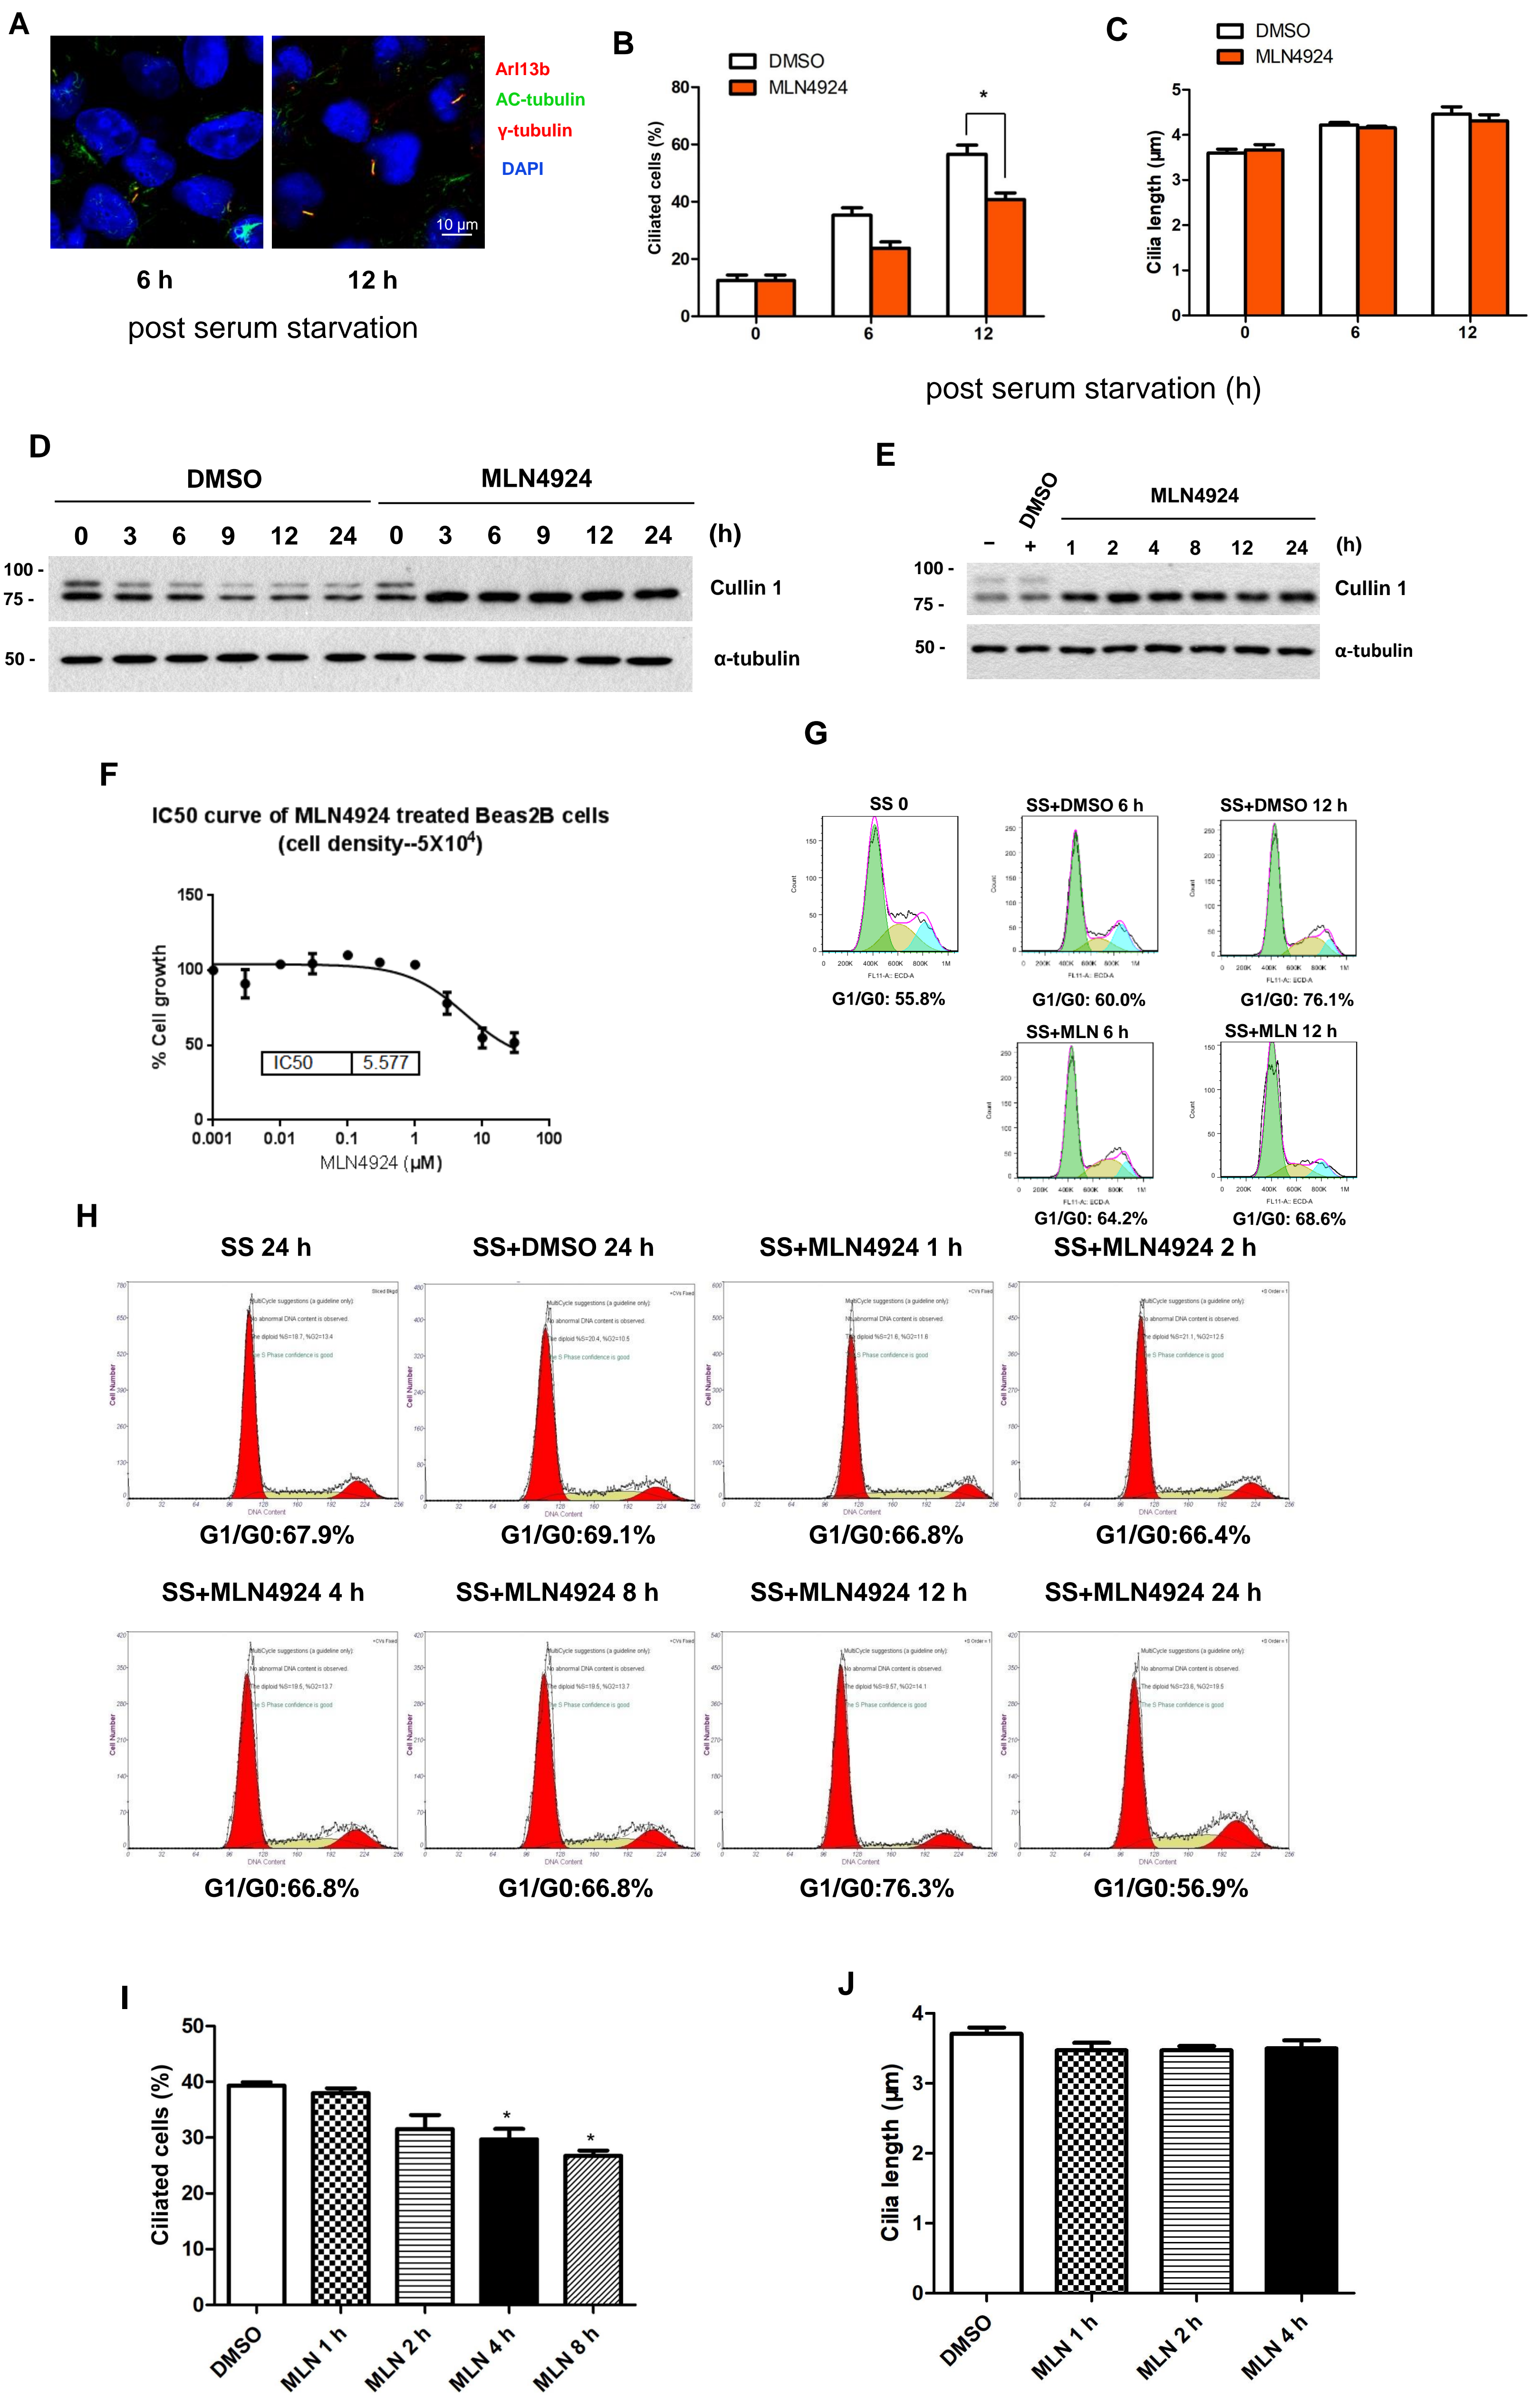

Figure S1. MLN4924 inhibits ciliogenesis by inhibiting cilia assembly and promoting cilia disassembly in multiple cell lines without G0/G1 phase change.

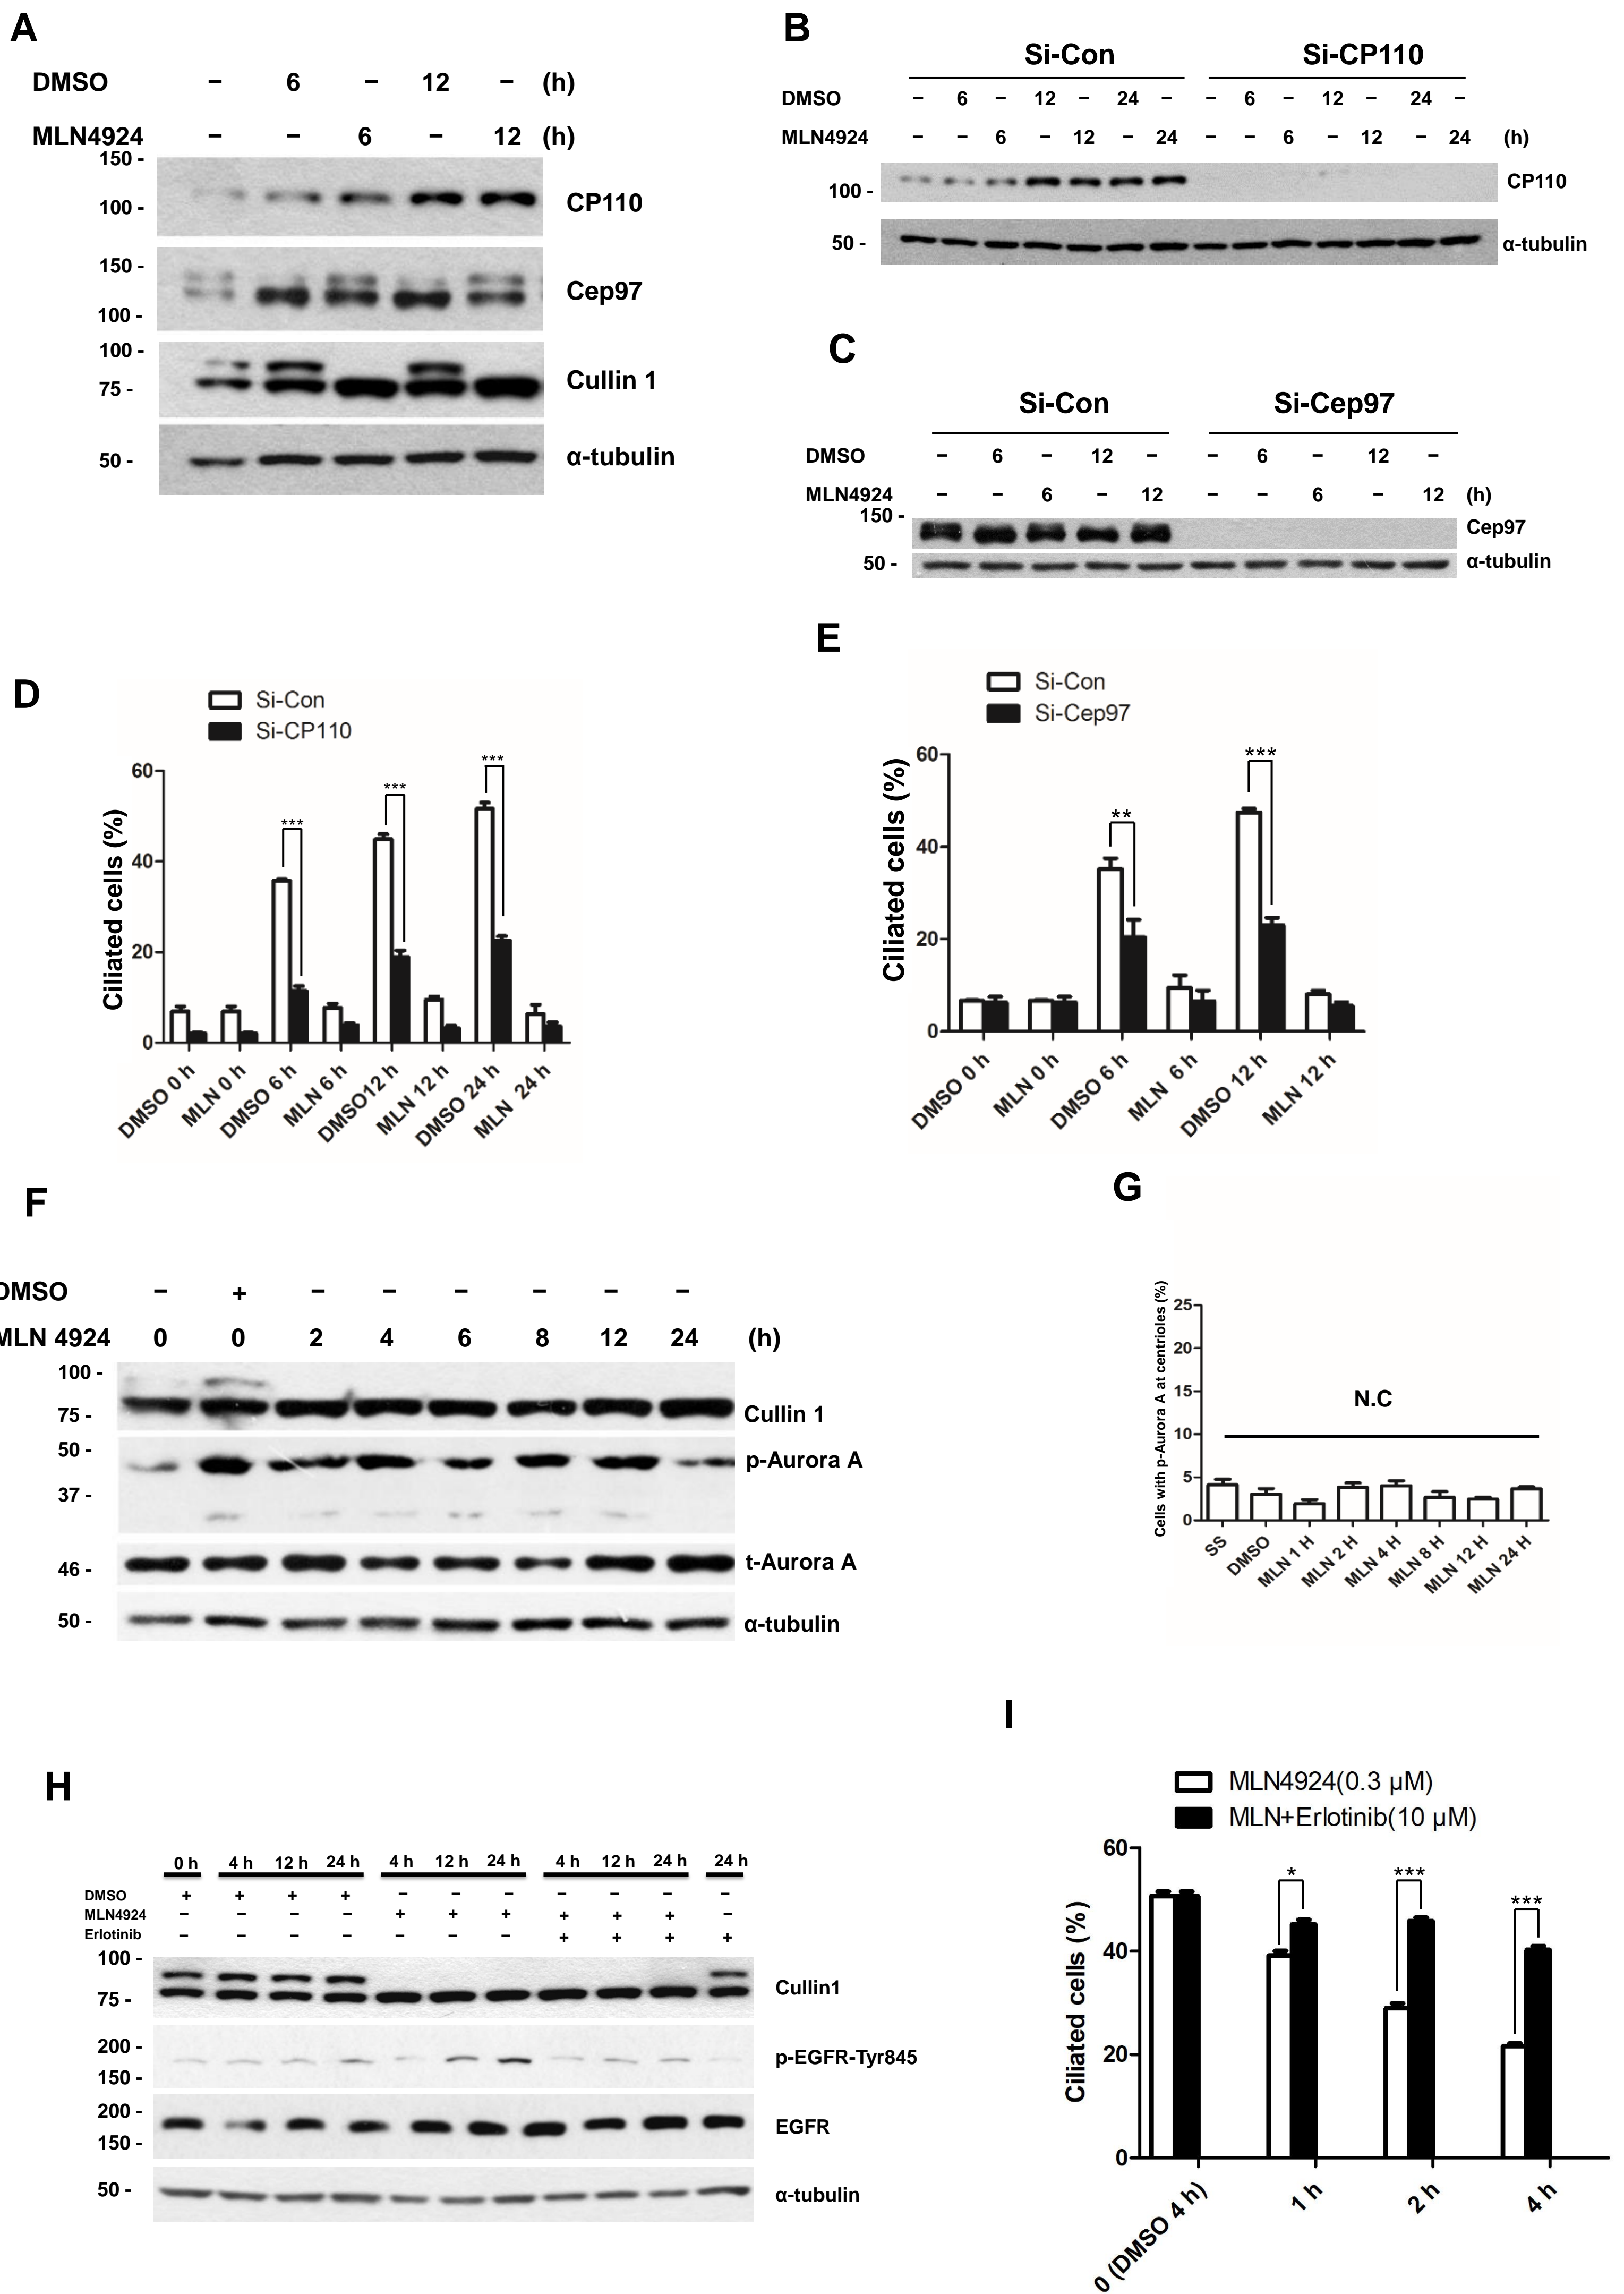

Figure S2. MLN4924 inhibition of cilia assembly is independent of CP110 and Cep97, but dependent of EGFR.

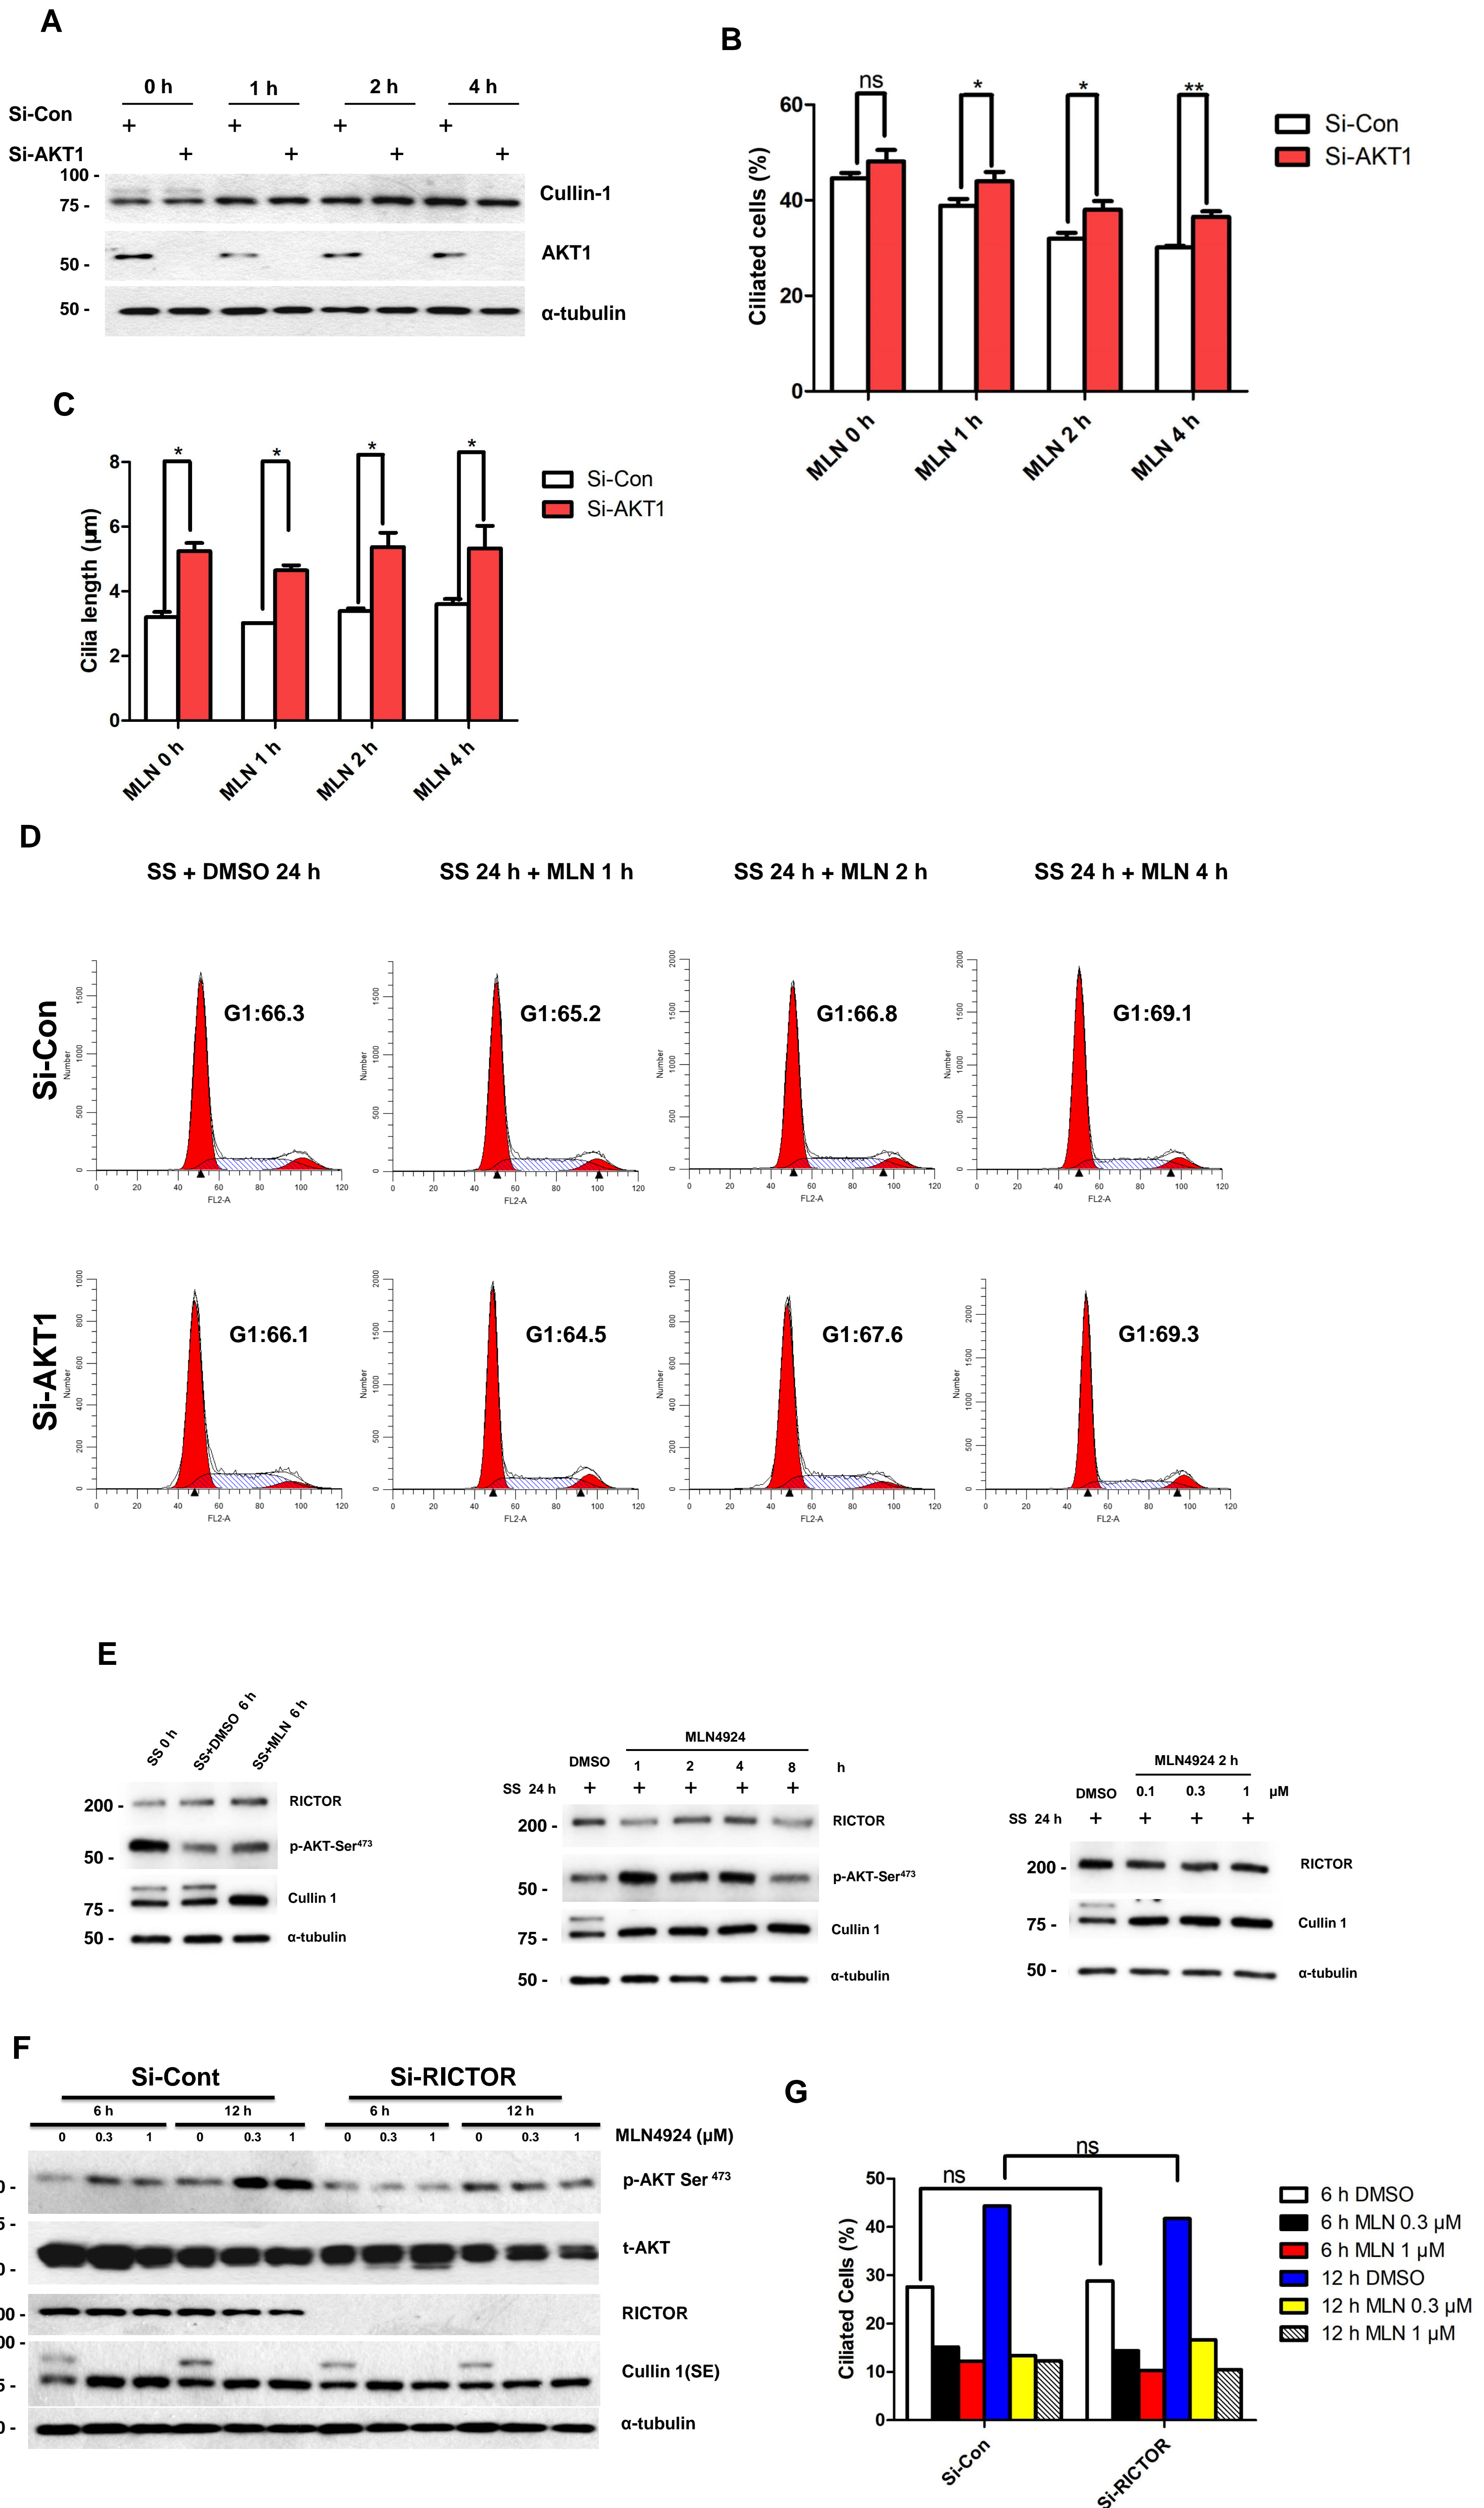

Figure S3. AKT1 involvement in MLN4924-induced cilia disassembly in RPE1 cells.

**A**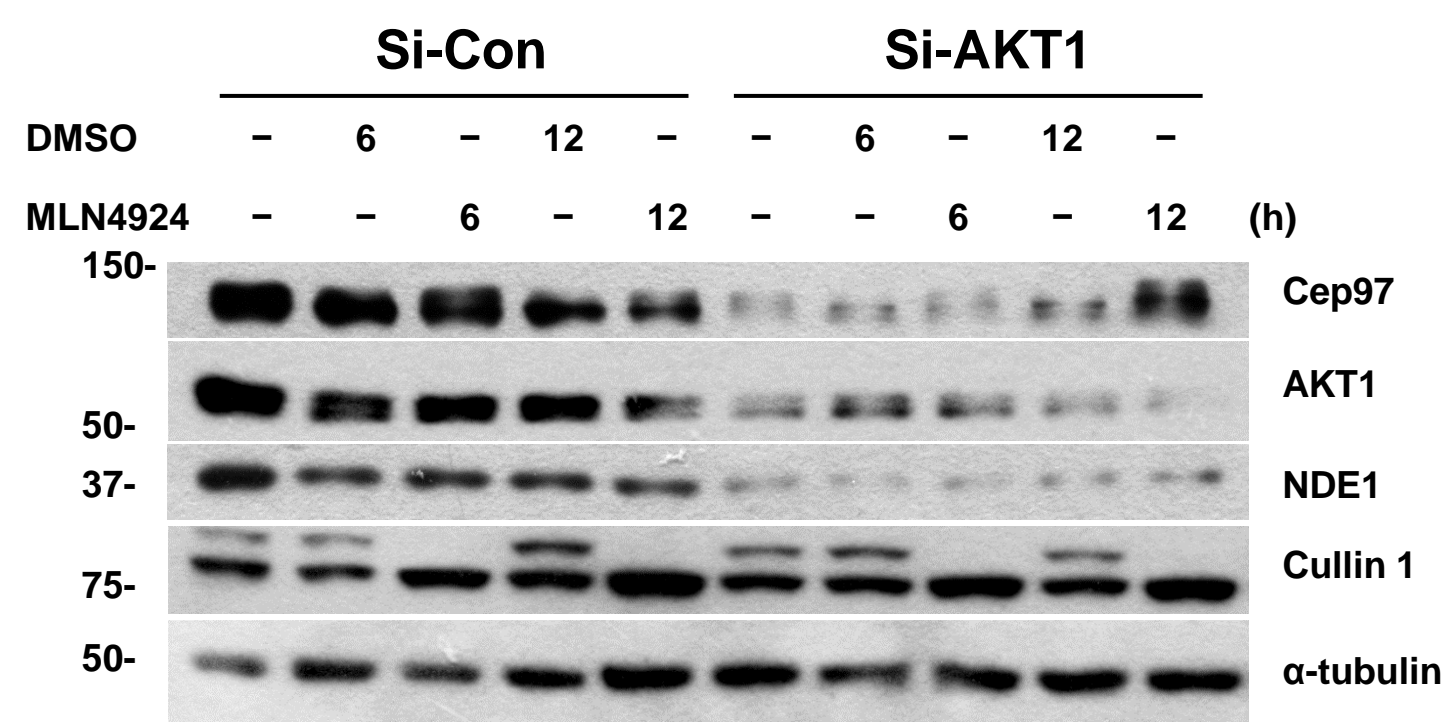**B**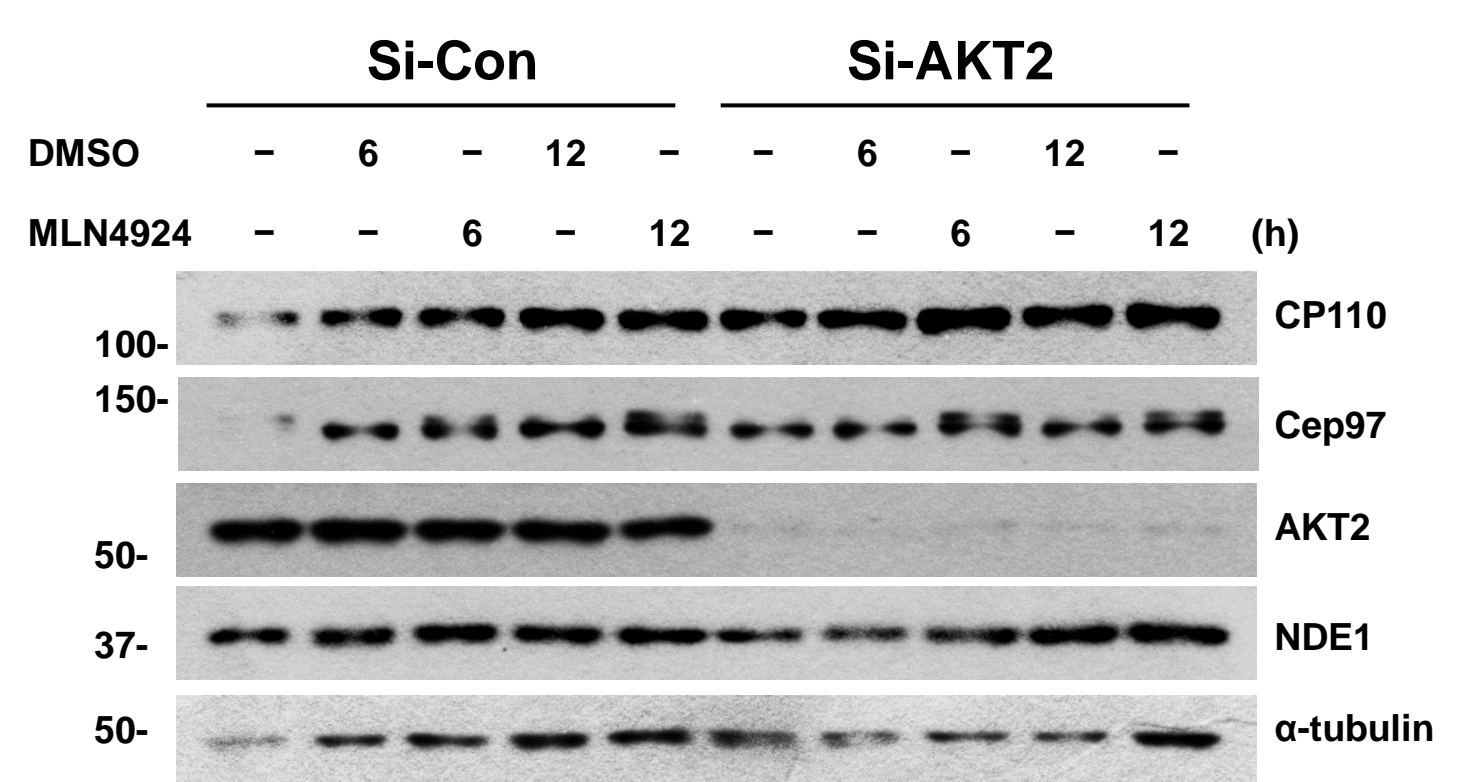**C**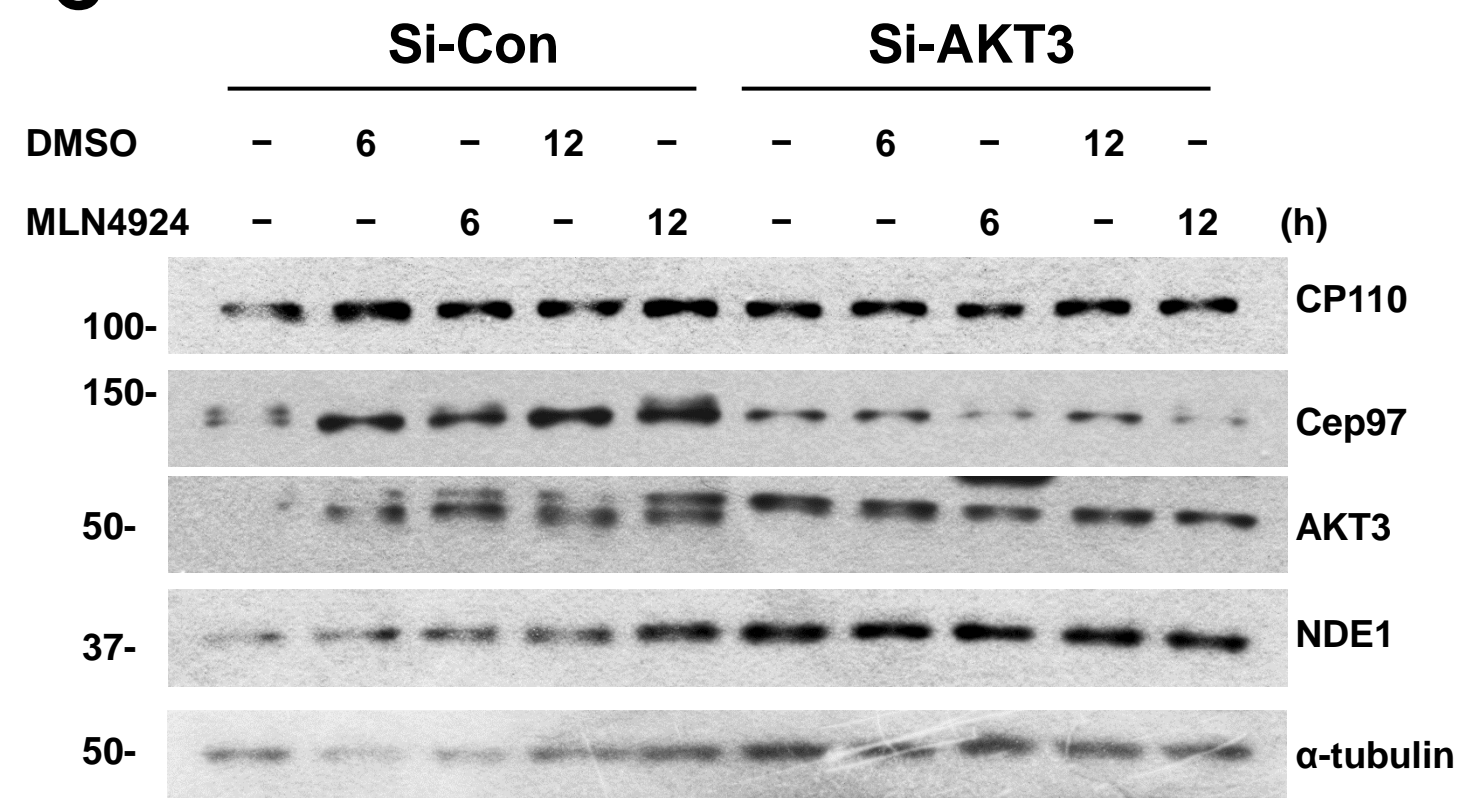**D**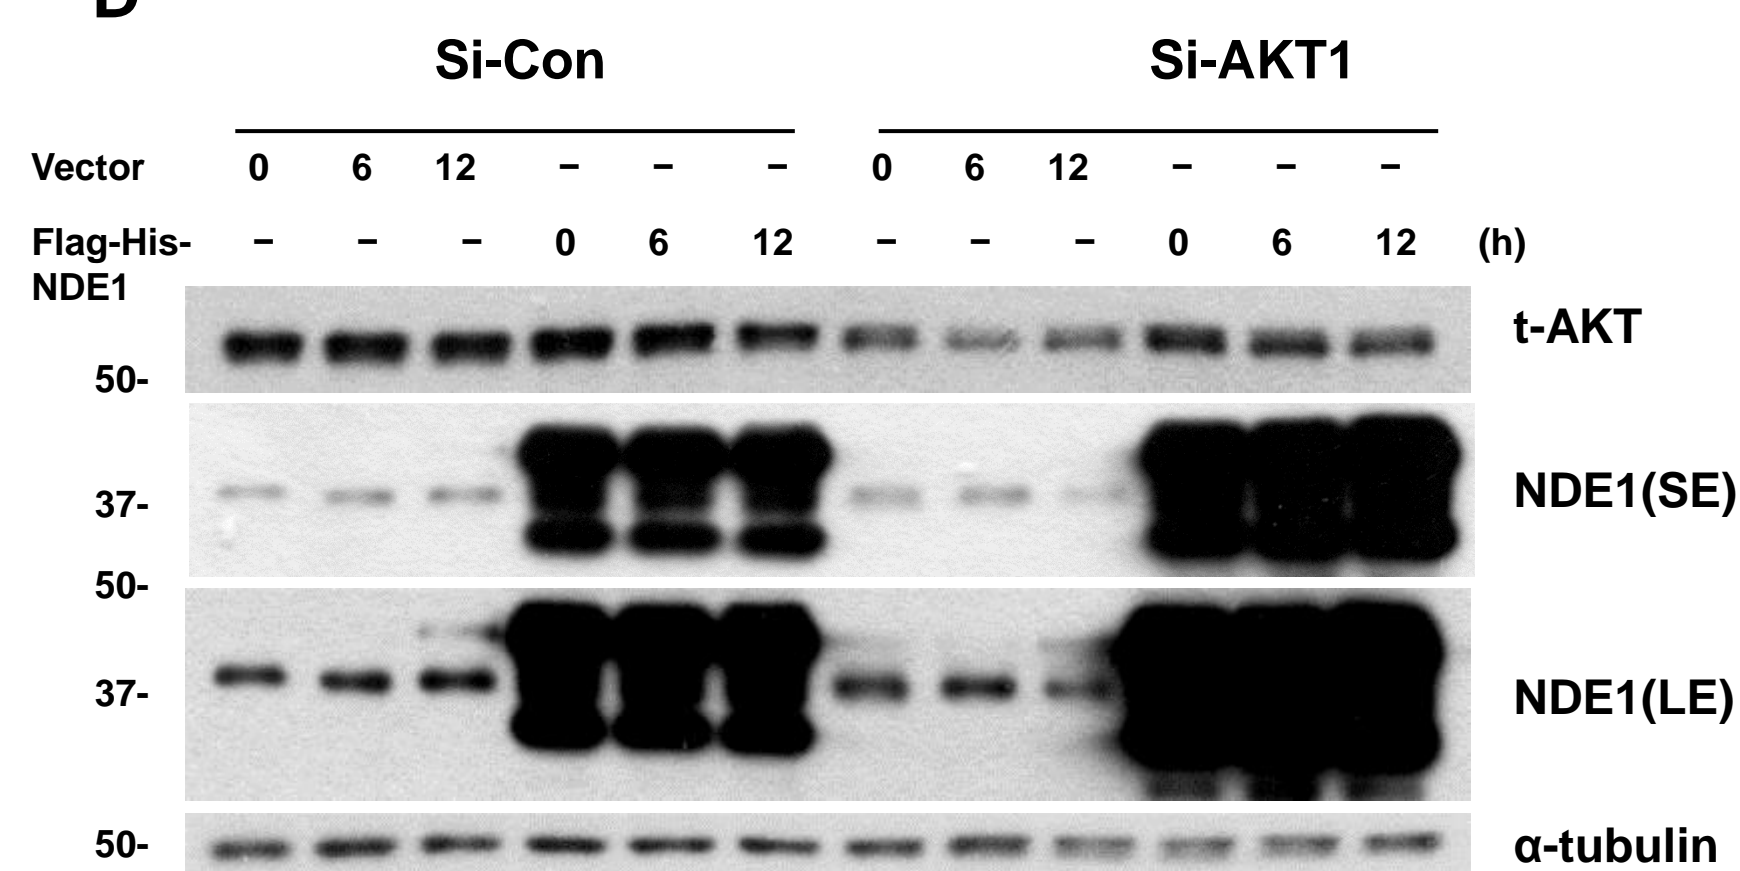**E**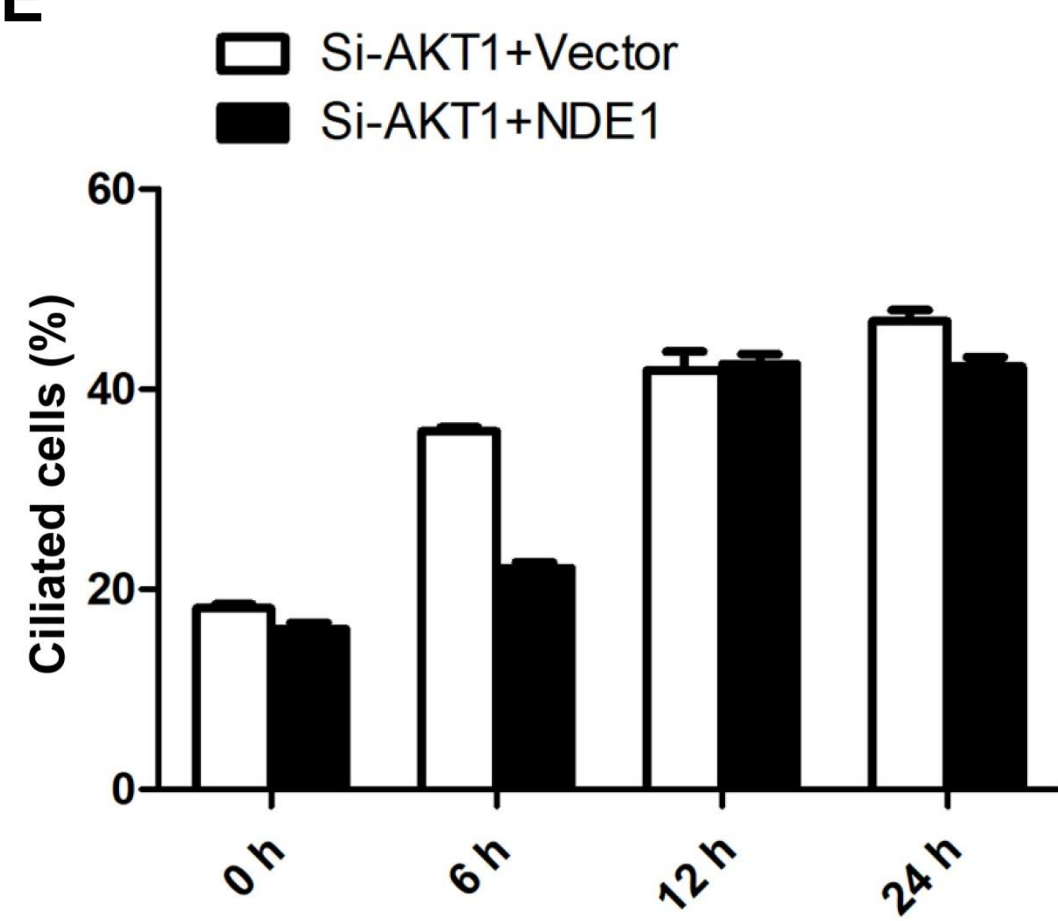**F**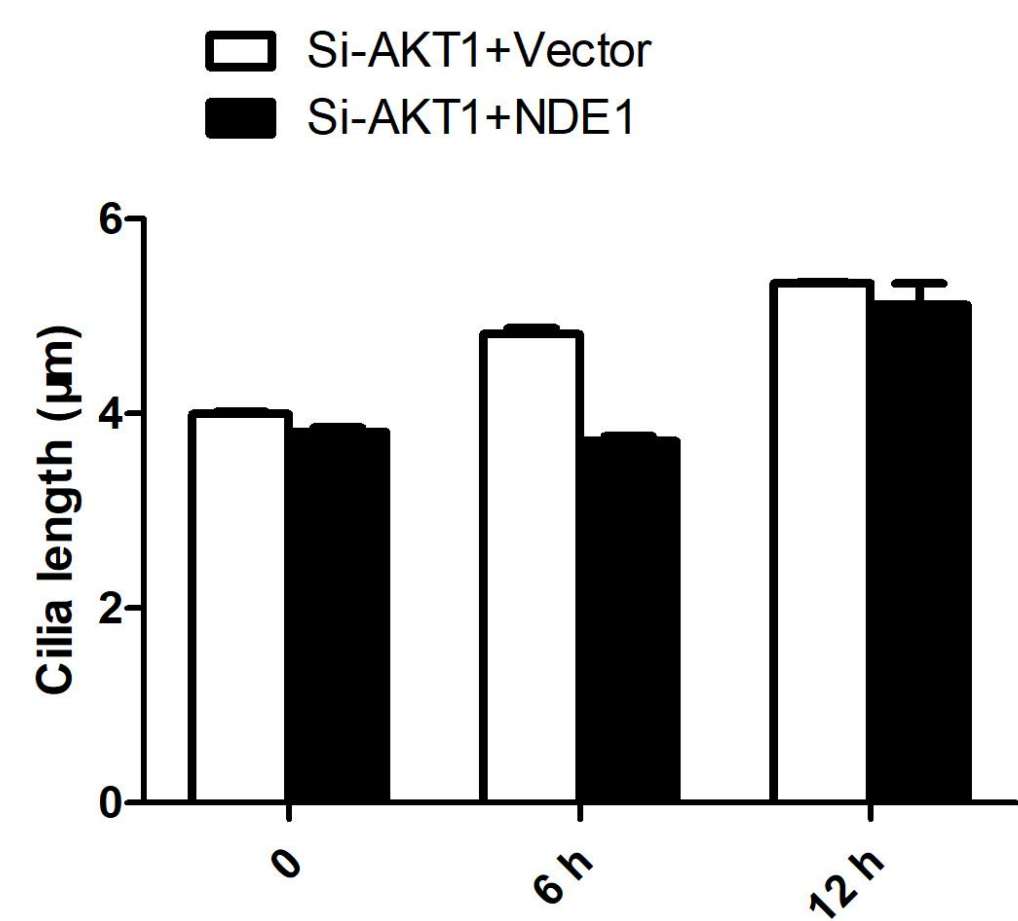

Figure S4. Effect of AKT family members and NDE1 on ciliogenesis.

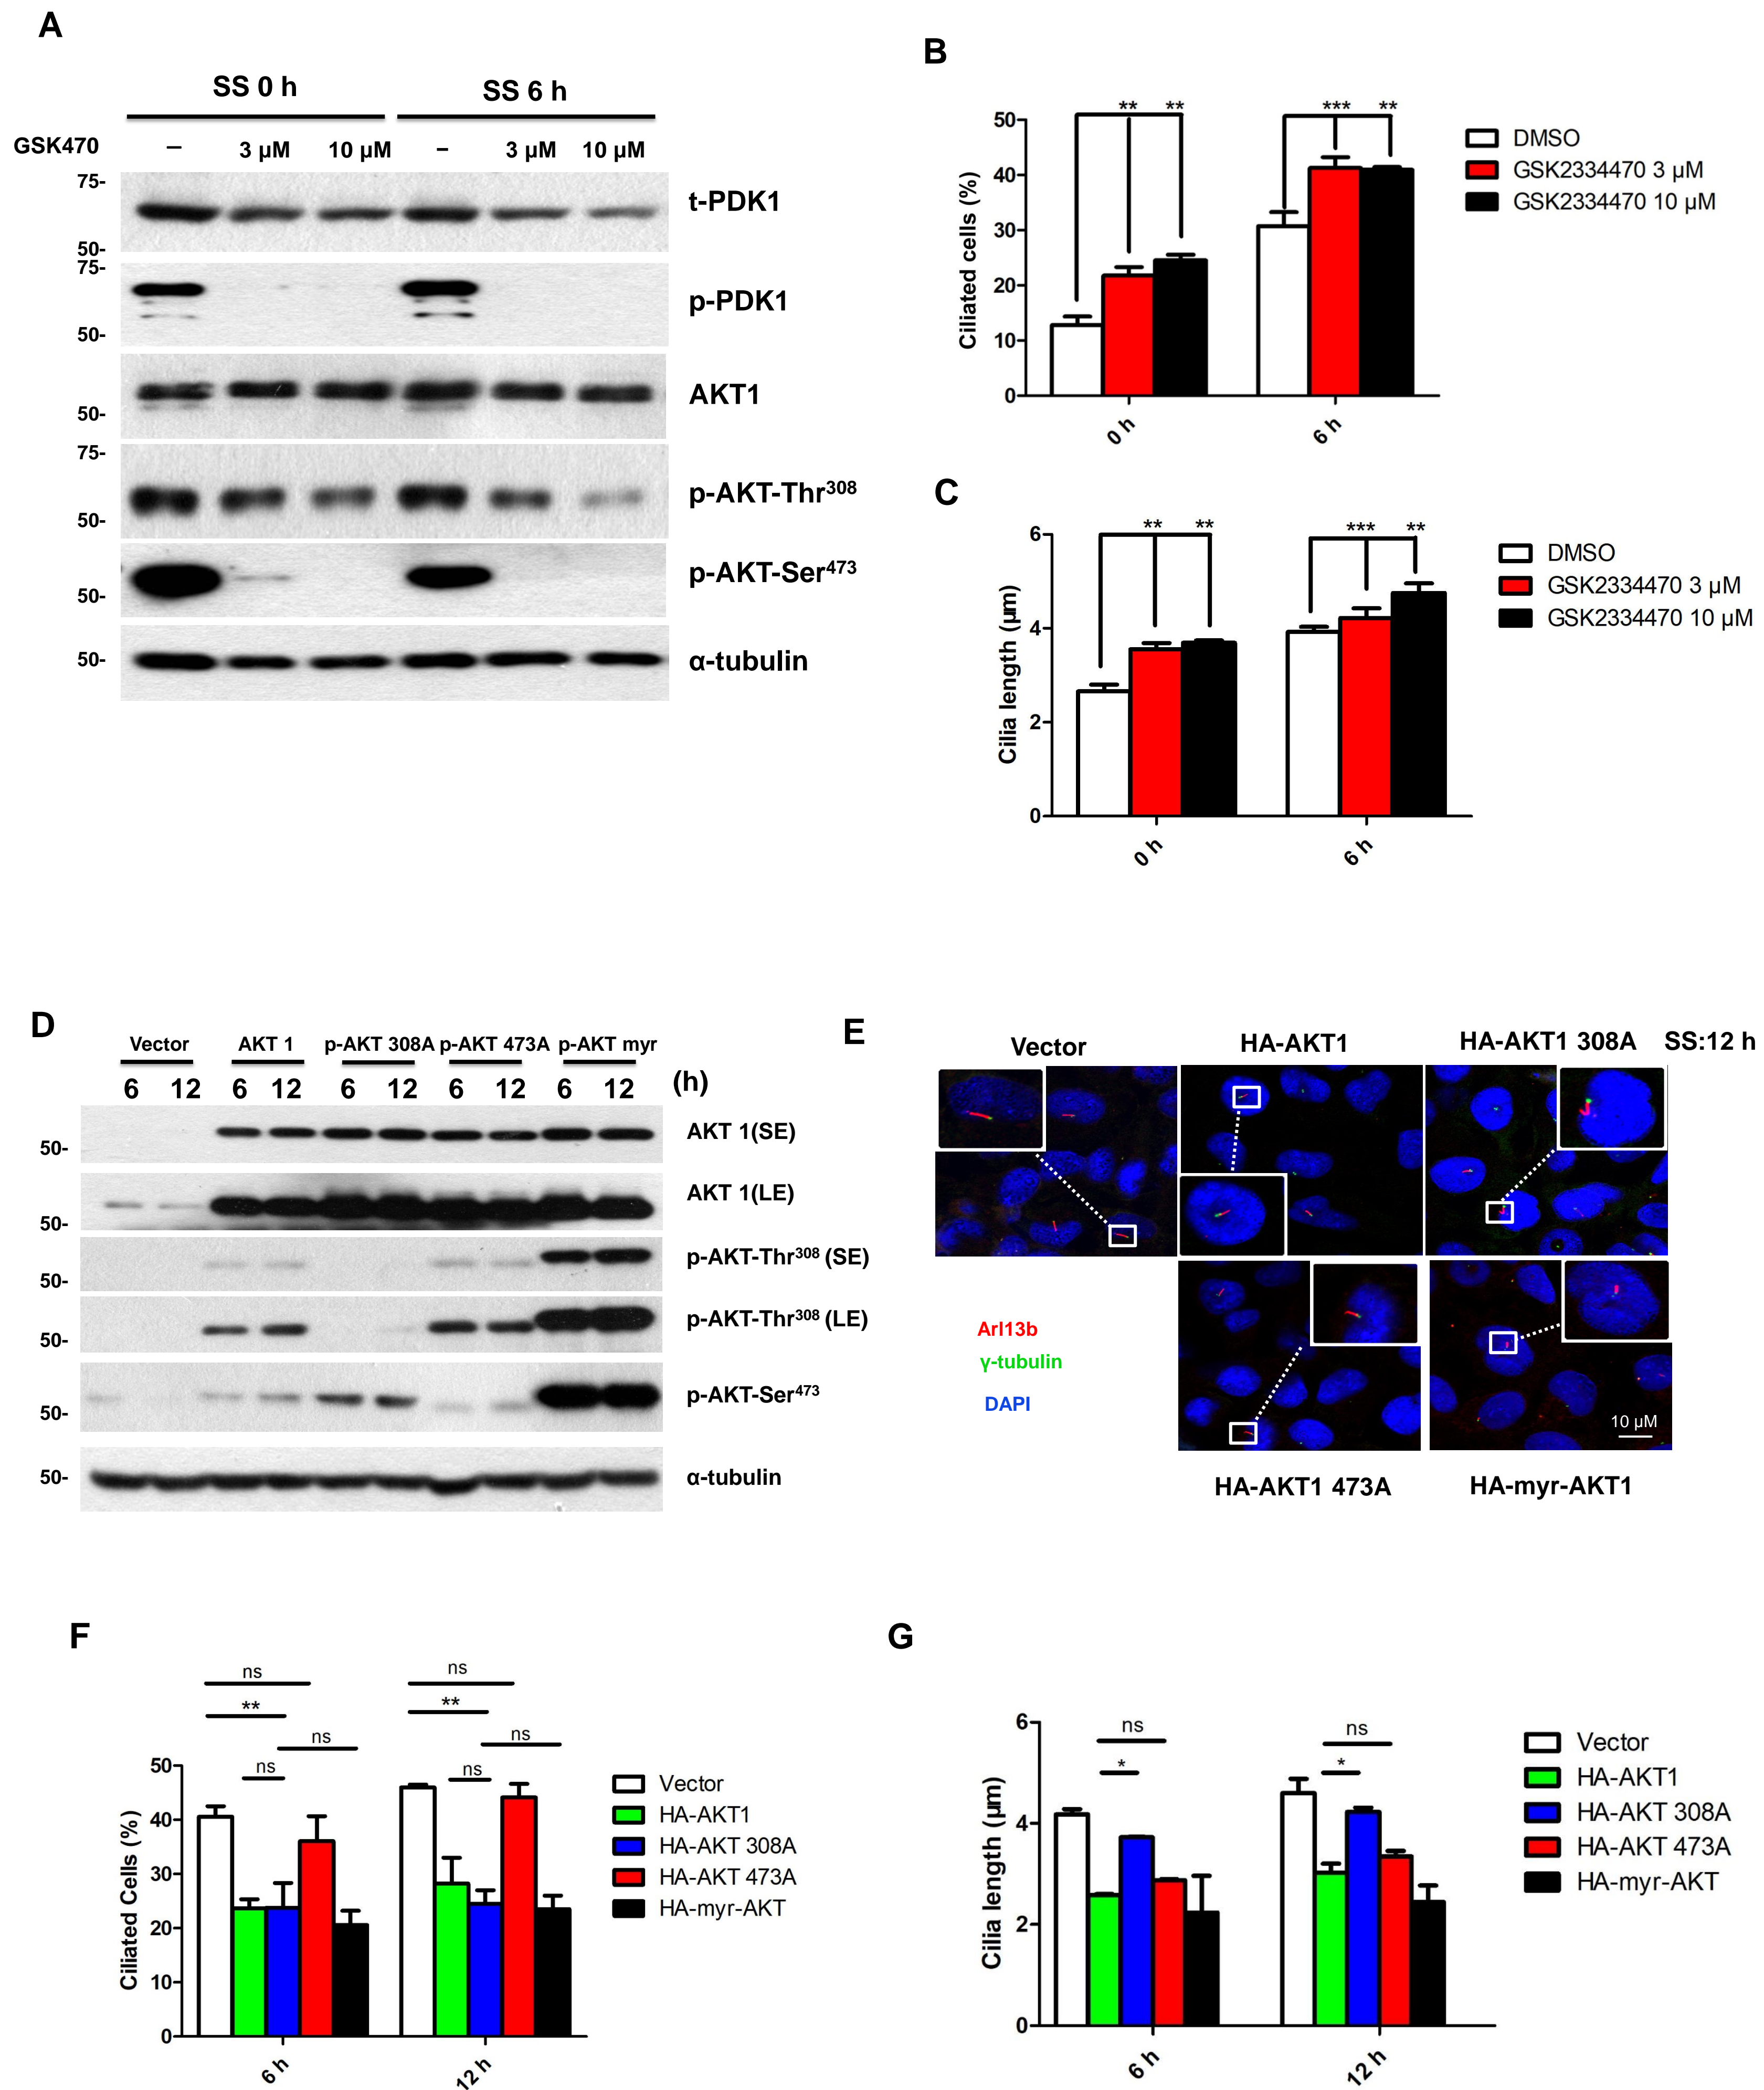Figure S5. pAKT-Thr<sup>308</sup> is responsible for inhibition of cilia growth in RPE1 cells.

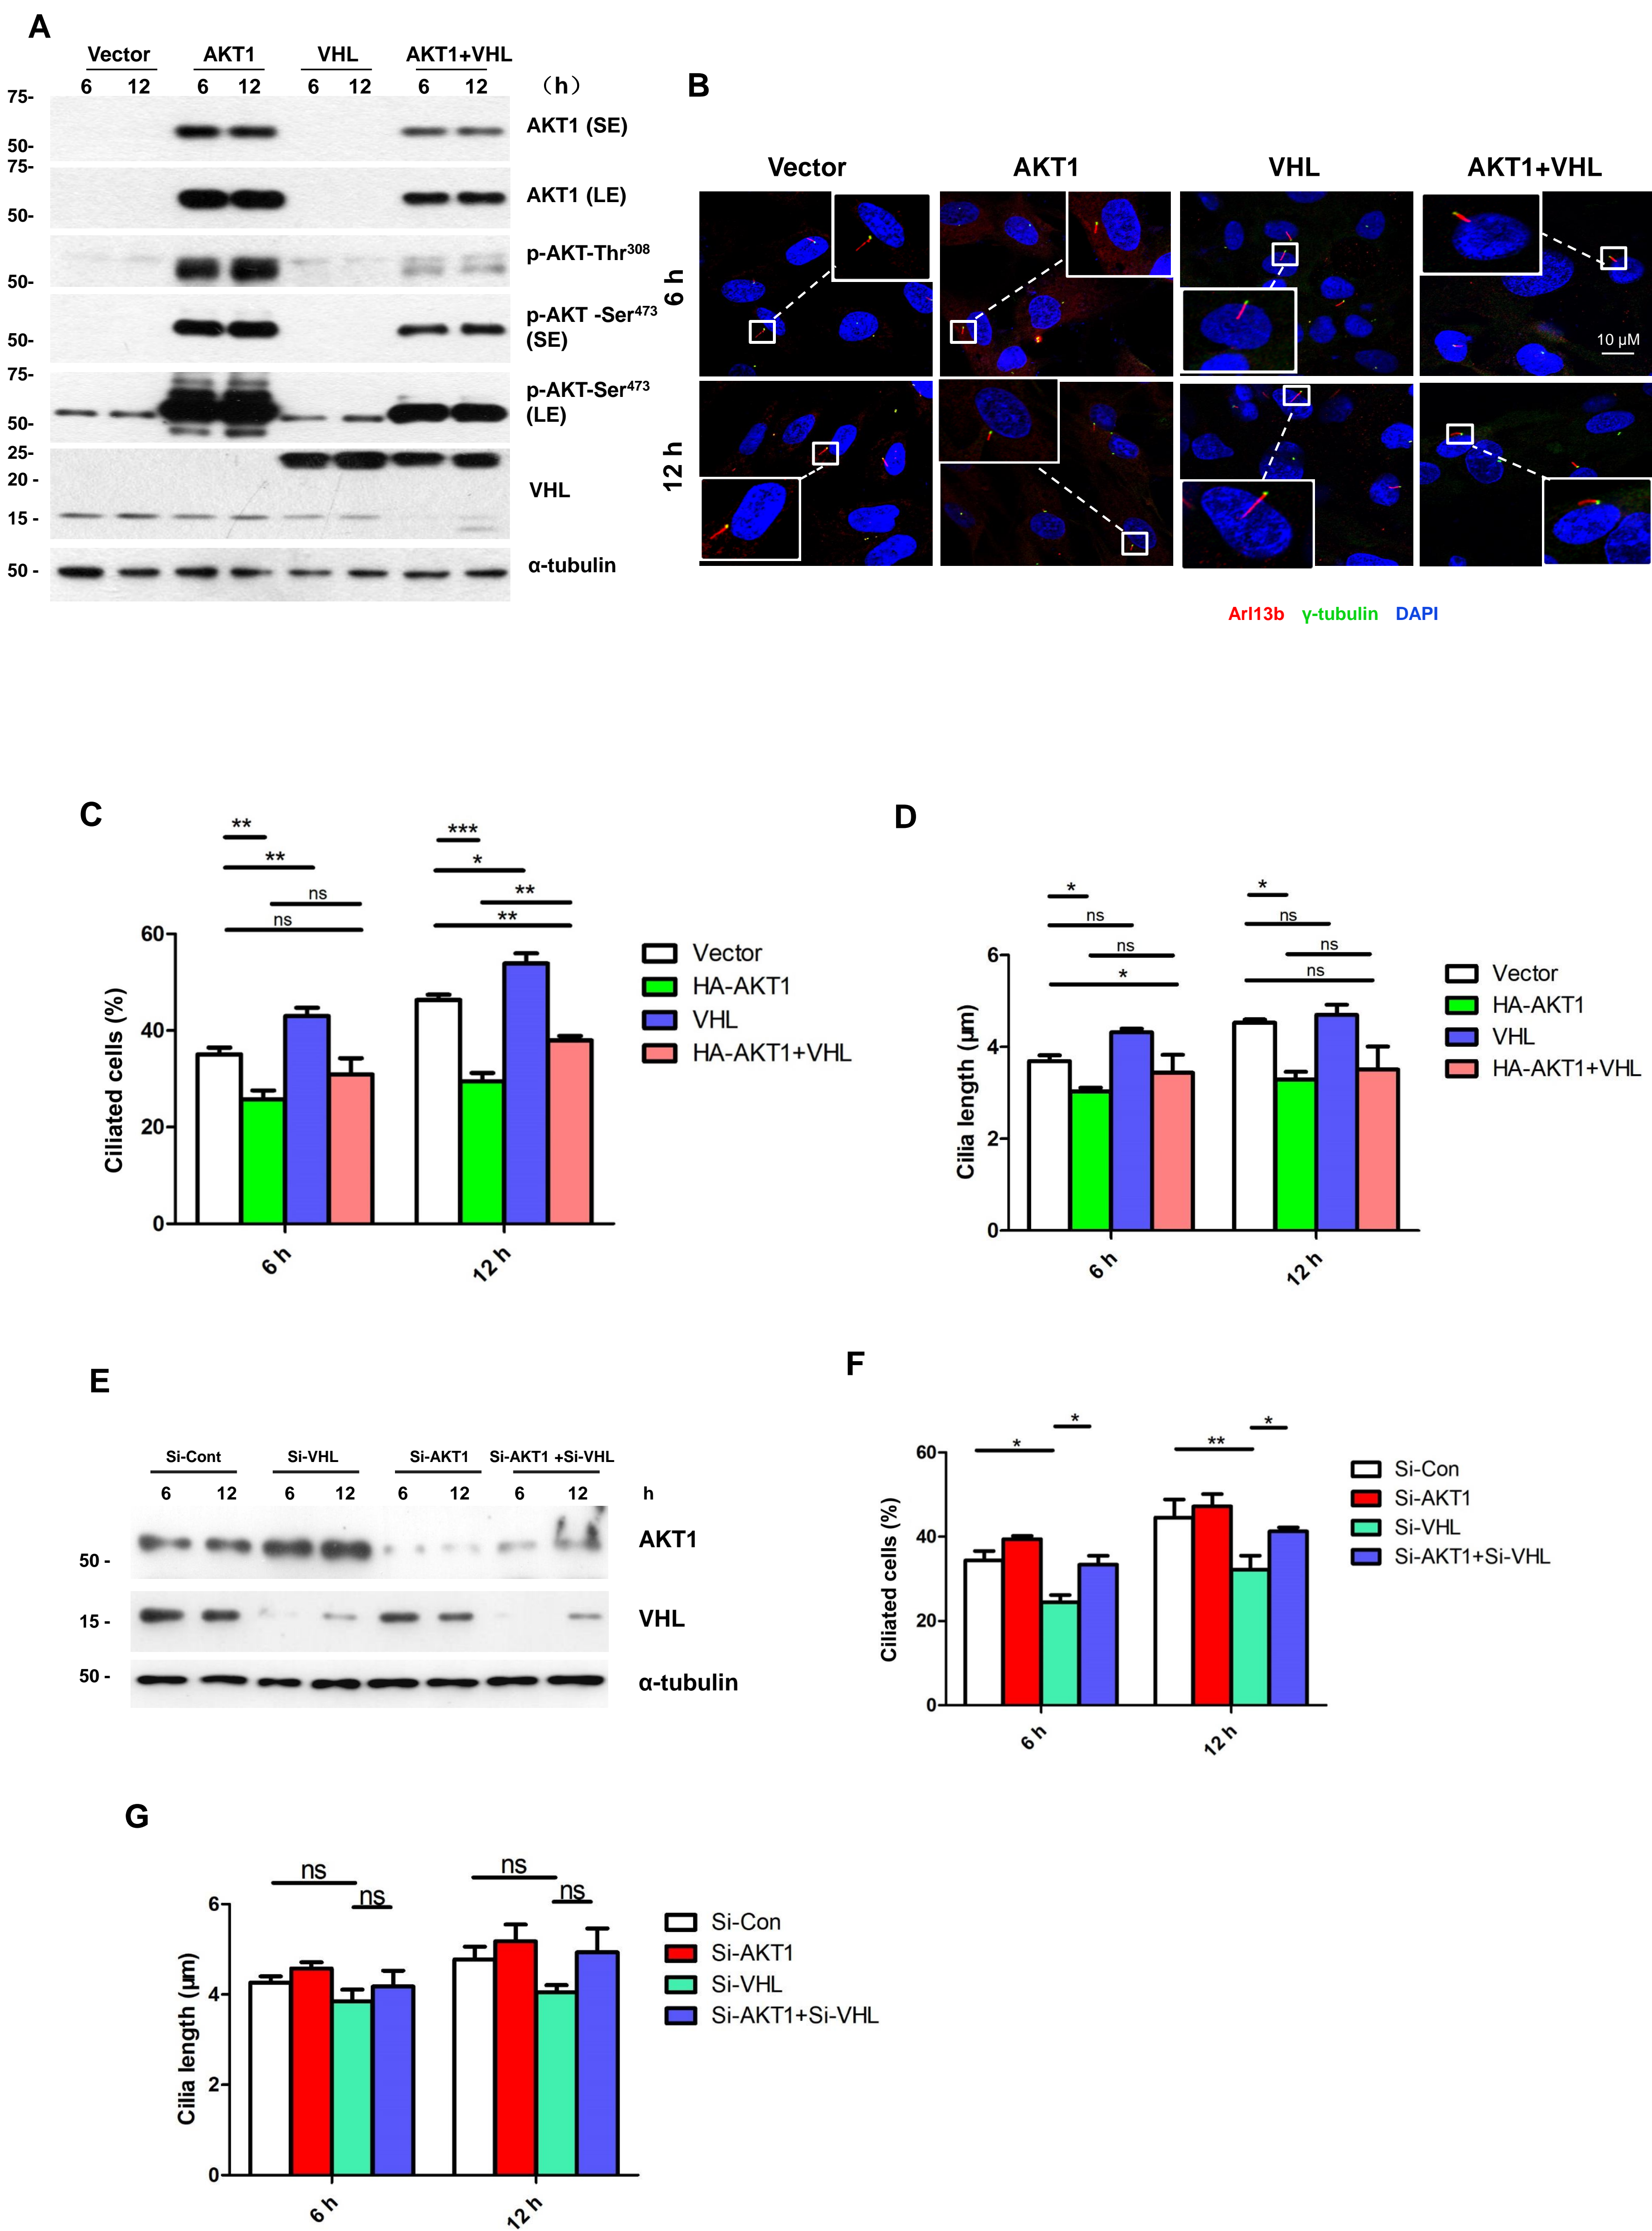

Figure S6. Cross-talk between AKT1 and pVHL in regulation of ciliogenesis in RPE1 cells.

**Before treatment**

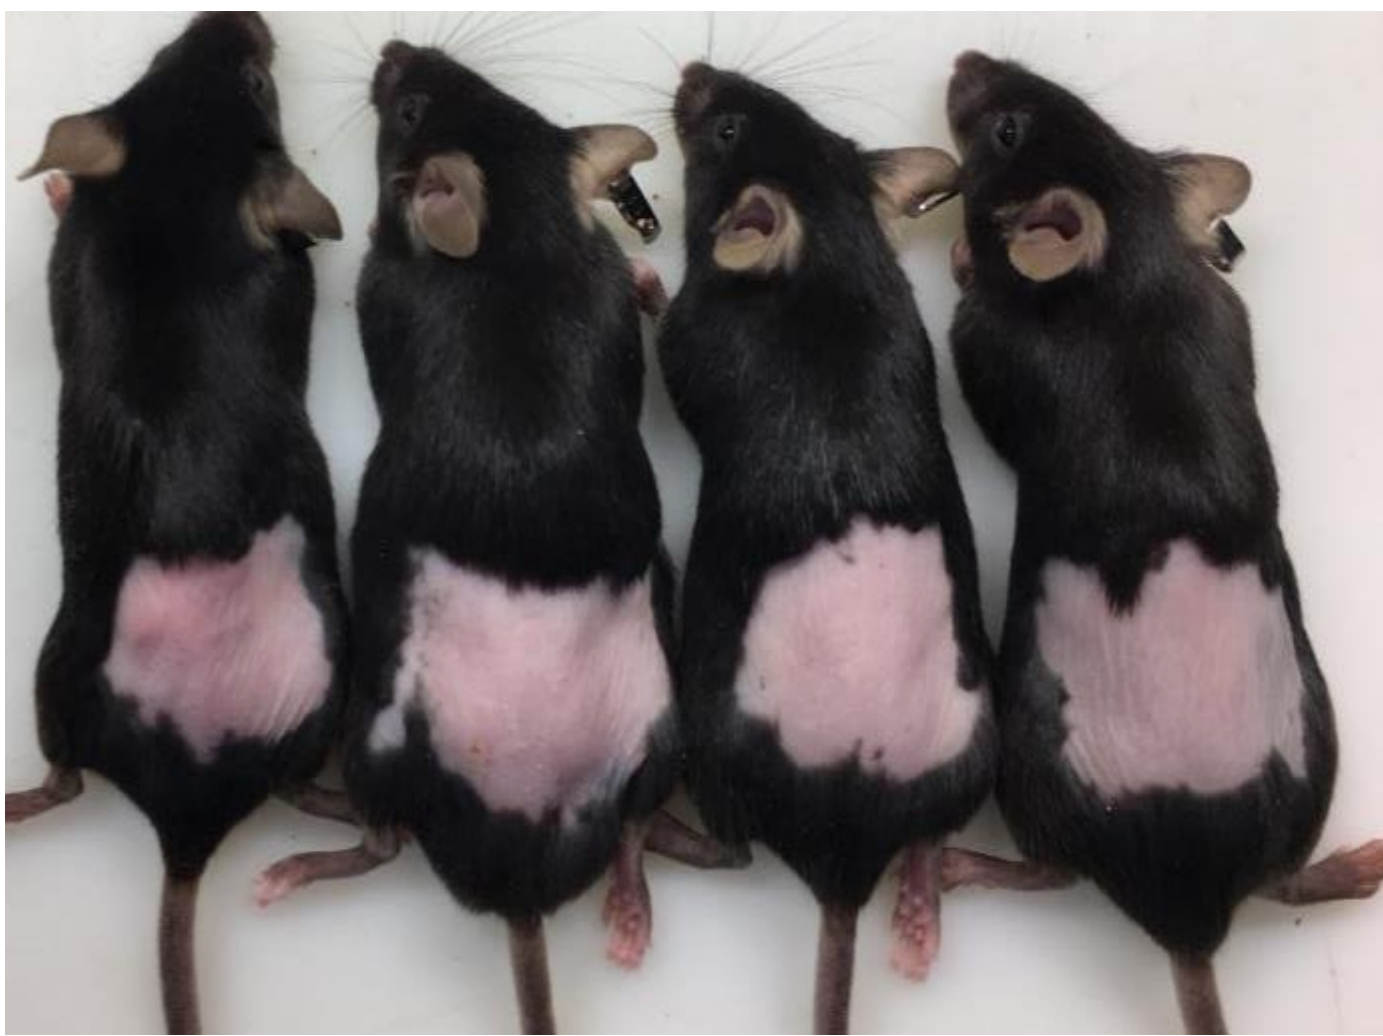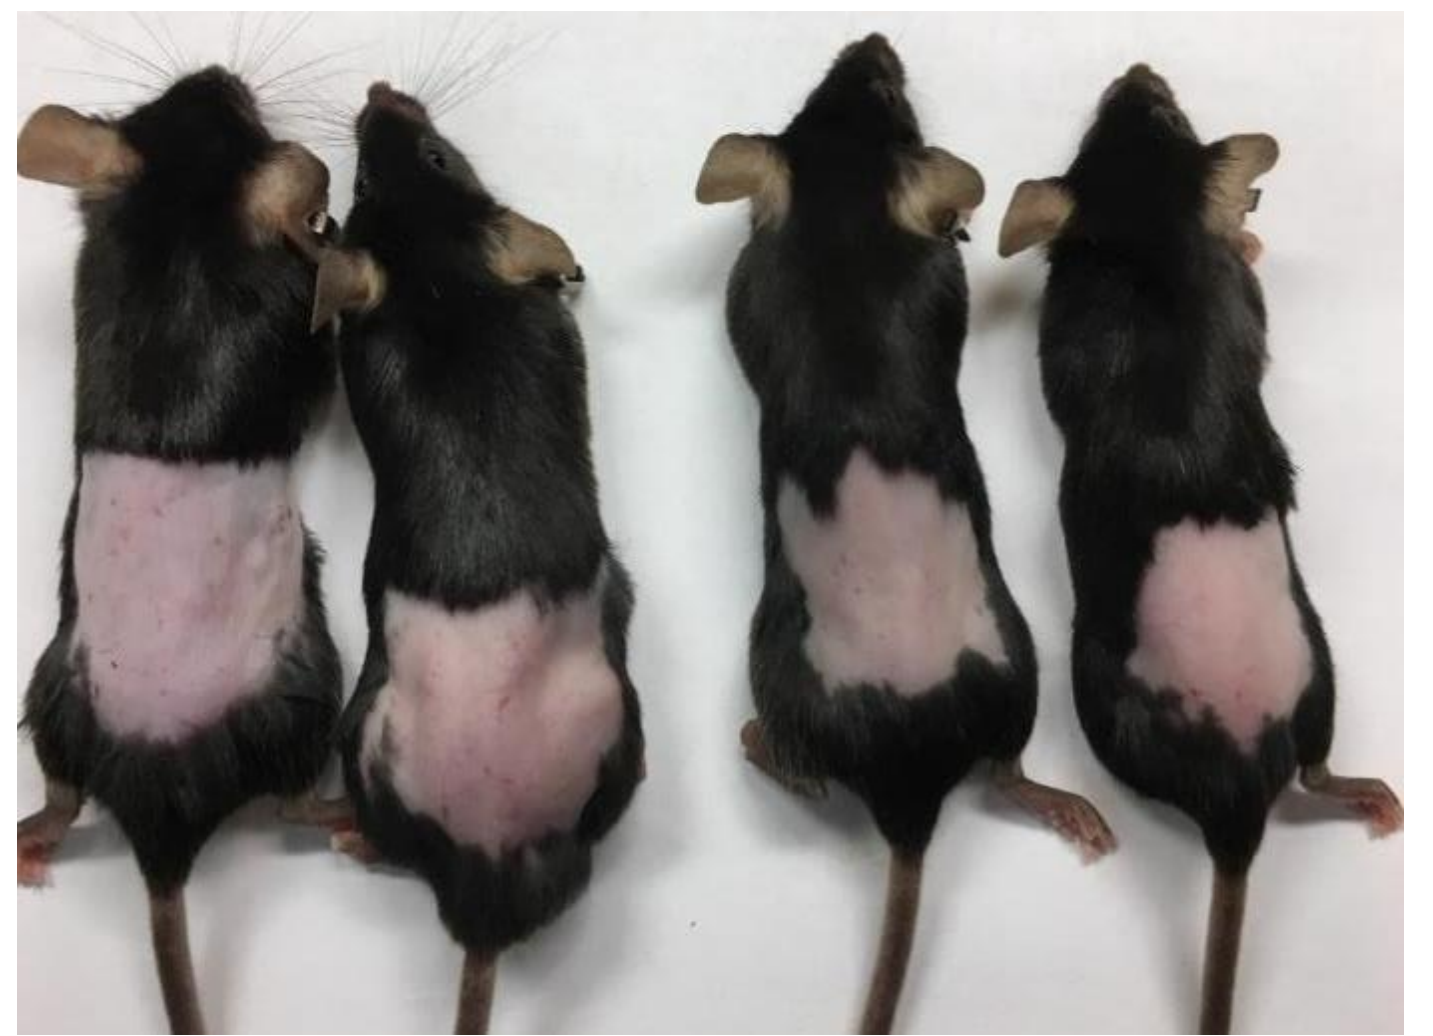

**After 2 weeks treatment**

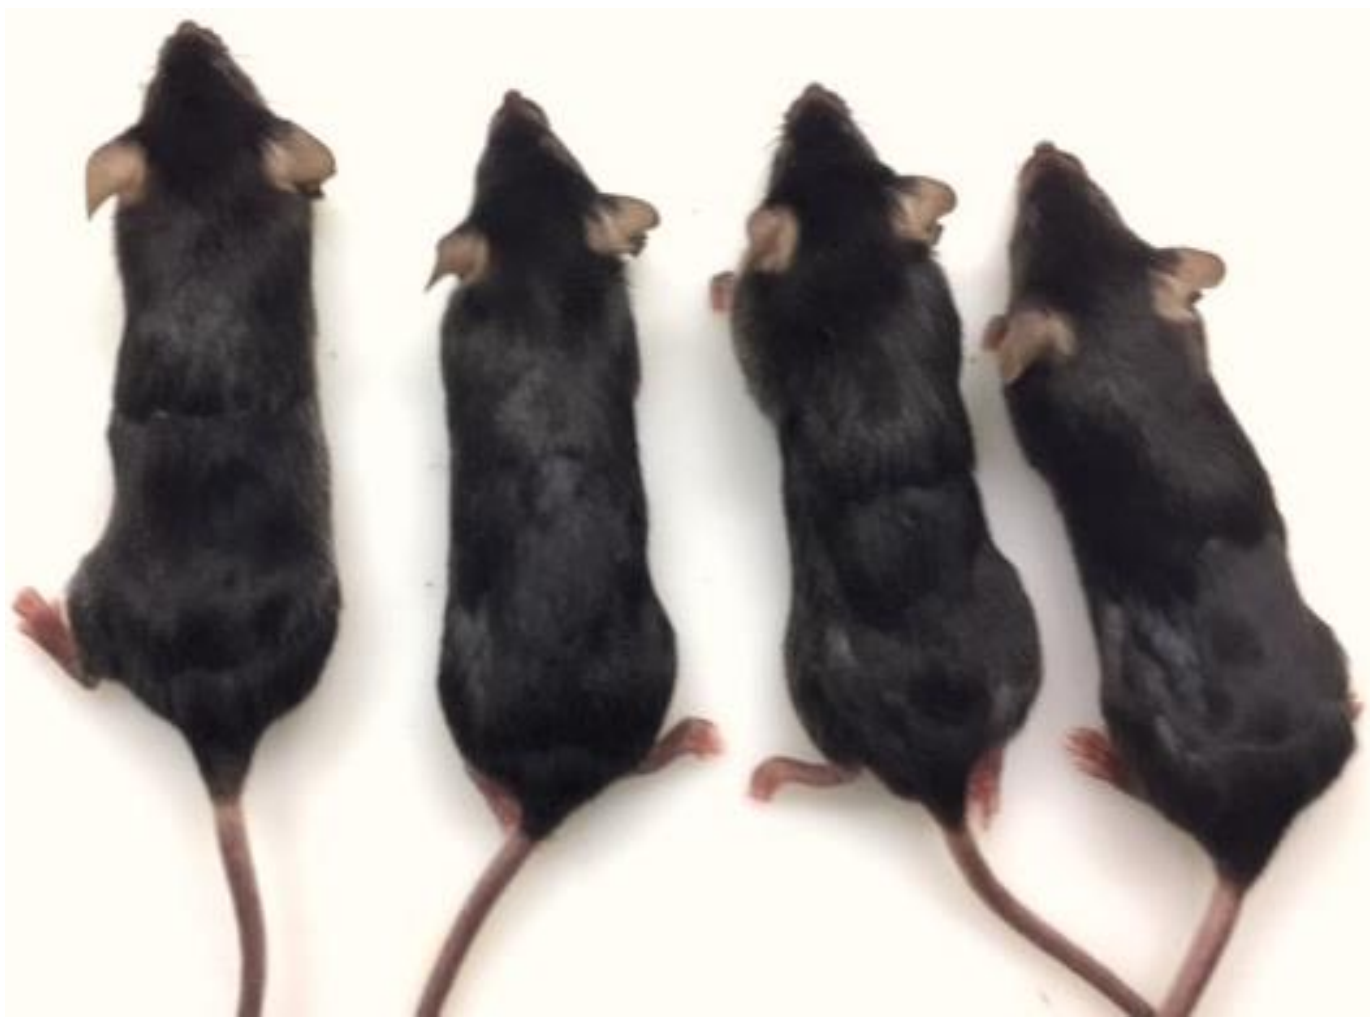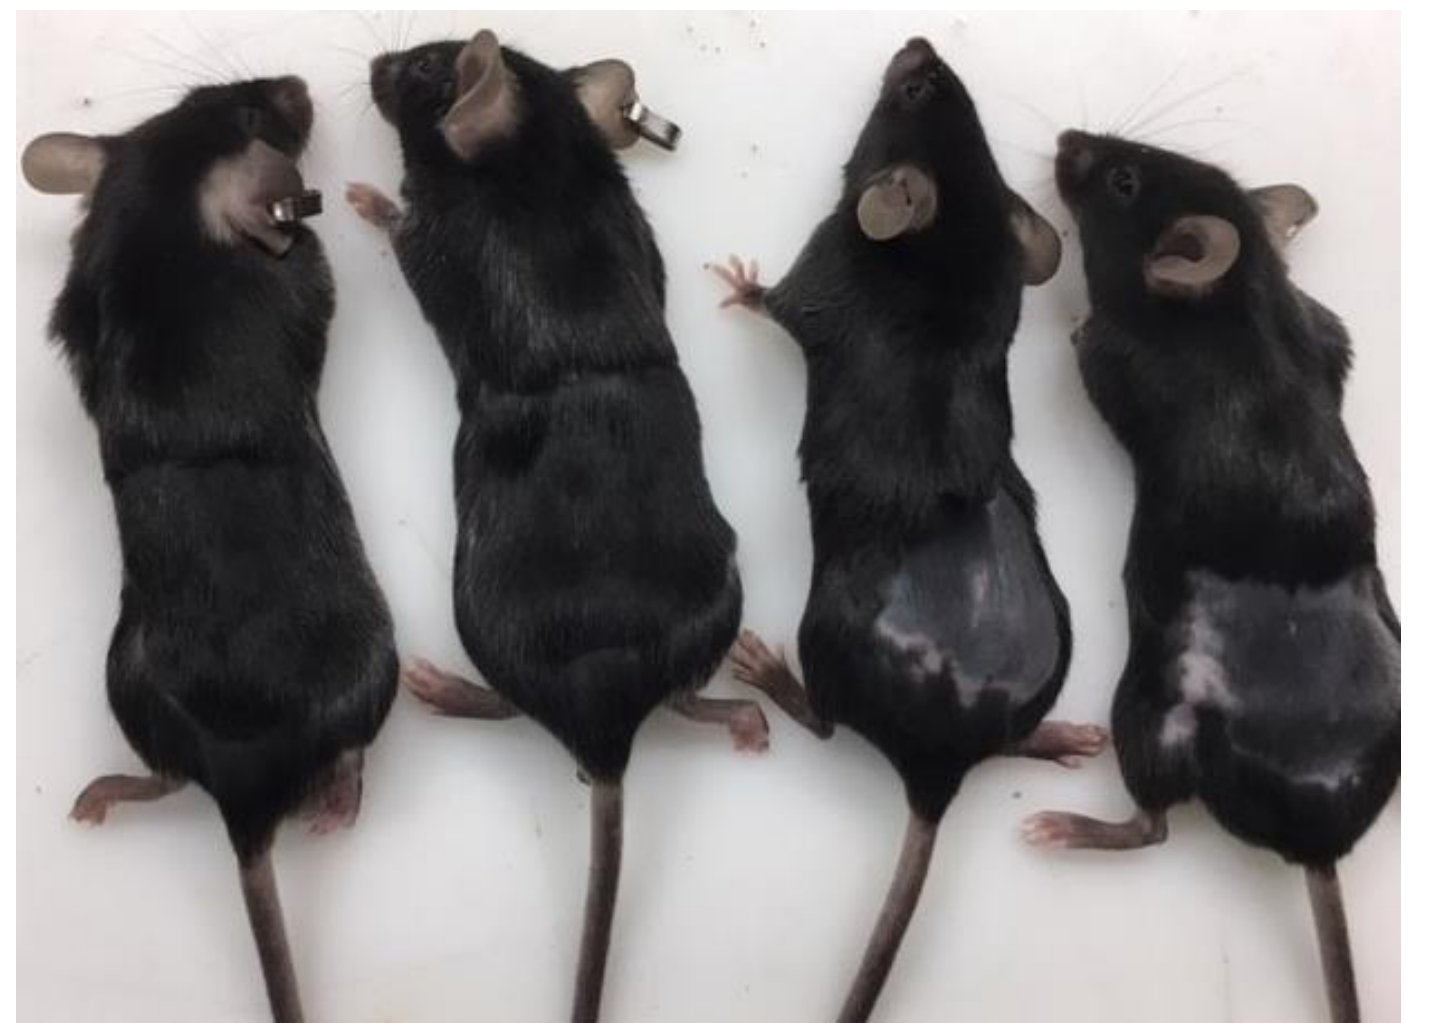

Vehicle (70% EtOH)

MLN4924 (0.3  $\mu$ M)

Vehicle (10% HPBCD)

MLN4924 (30mg/kg)

**Local application**

**s.c. Injection**

Figure S7. MLN4924 suppresses hair regrowth.
